# Supplementary material for: TGF-β/Smad Signalling Activation by HTRA1 Regulates the Function of Human Lens Epithelial Cells and Its Mechanism in Posterior Subcapsular Congenital Cataract
Source: MDPI journal article supplement (doi:10.3390/ijms232214431), 2022-11-20
Supplement: s1 [file s1]

Table S1. Primers for RT-qPCR assay.

| Target        | F/R     | Primer Sequence (5'→3') | Amplicon Size (BP) |
|---------------|---------|-------------------------|--------------------|
| TGFB1         | Forward | CTAATGGTGGAAACCCACAACG  | 209                |
|               | Reverse | TATCGCCAGGAATTGTTGCTG   |                    |
| TGFB2         | Forward | GAGAGGAGCGACGAAGAGTA    | 687                |
|               | Reverse | CTCAAGTCTGTAGGAGGGCA    |                    |
| TGFB1         | Forward | CACAGAGTGGGAACAAAAAGGT  | 143                |
|               | Reverse | CCAATGGAACATCGTCGAGCA   |                    |
| PAI 1         | Forward | ACCGCAACGTGGTTTTCTCA    | 109                |
|               | Reverse | TTGAATCCCATAGCTGCTTGAAT |                    |
| CTGF          | Forward | ACCGACTGGAAGACACGTTTG   | 195                |
|               | Reverse | CCAGGTCAGCTTCGCAAGG     |                    |
| HTRA1         | Forward | TCCCAACAGTTTGCGCCATAA   | 119                |
|               | Reverse | CCGGCACCTCTCGTTTAGAAA   |                    |
| XBP-1s        | Forward | CTGAGTCCGAATCAGGTGCAG   | 59                 |
|               | Reverse | ATCCATGGGGAGATGTTCTGG   |                    |
| ATF6          | Forward | TCGGTCAGTGGACTCTTATT    | 153                |
|               | Reverse | CCAGTGACAGGCTTATCTTC    |                    |
| IRE1          | Forward | GGACAGGCTCAATCAAATGG    | 255                |
|               | Reverse | CGGTCAGGAGGTCAATAACA    |                    |
| BIP           | Forward | CATCACGCCGTCCTATGTCG    | 104                |
|               | Reverse | CGTCAAAGACCGTGTTCTCG    |                    |
| FN1           | Forward | CGGTGGCTGTCAGTCAAAG     | 130                |
|               | Reverse | AAACCTCGGCTTCCTCCATAA   |                    |
| VIM           | Forward | GACGCCATCAACACCGAGTT    | 238                |
|               | Reverse | CTTTGTCGTTGGTTAGCTGGT   |                    |
| $\alpha$ -SMA | Forward | TGCCAACAACGTCATGTCG     | 79                 |
|               | Reverse | CAGCGCGGTGATCTCTTTCT    |                    |
| GAPDH         | Forward | GGAGCGAGATCCCTCCAAAAT   | 197                |
|               | Reverse | GGCTGTTGTCATACTTCTCATGG |                    |

Table S2. Antibody list

| Protein                                          | Brand            | Catalog number | Dilution                      |
|--------------------------------------------------|------------------|----------------|-------------------------------|
| HTRA1                                            | Abcam, UK        | Ab274322       | 1:1000 for WB<br>1:100 for IF |
| HRP-conjugated $\beta$ -actin                    | Proteintech, USA | HRP-60008      | 1:5000 for WB                 |
| Bcl2                                             | Proteintech, USA | 26593-1-AP     | 1:1000                        |
| BAX                                              | Proteintech, USA | 50599-2-Ig     | 1:1000                        |
| Cleaved-caspase-3                                | CST, USA         | 9661           | 1:1000                        |
| SMAD 2/3                                         | Abcam, UK        | Ab202445       | 1:1000                        |
| p-SMAD 2/3                                       | Abcam, UK        | Ab254407       | 1:1000                        |
| TGF- $\beta$ 1                                   | Proteintech, USA | 21898-1-AP     | 1:1000 for WB<br>1:200 for IF |
| TGF- $\beta$ 2                                   | Proteintech, USA | 19999-1-AP     | 1:1000 for WB<br>1:200 for IF |
| FN1                                              | Proteintech, USA | 15613-1-AP     | 1:2000                        |
| $\alpha$ -SMA                                    | CST, USA         | 19245          | 1:1000                        |
| PAI-1                                            | Proteintech, USA | 13801-1-AP     | 1:1000                        |
| CTGF                                             | Proteintech, USA | 25474-1-AP     | 1:1000                        |
| TGF- $\beta$ R1                                  | Abcam, UK        | Ab235578       | 1:1000                        |
| HRP-labelled Goat Anti-Rabbit IgG(H+L)           | Beyotime         | A0208          | 1:1000                        |
| HRP-labelled Goat Anti-Mouse IgG(H+L)            | Beyotime         | A0216          | 1:1000                        |
| Anti-rabbit, Secondary Antibody, Alexa Fluor 488 | Abcam, UK        | Ab150077       | 1:1000                        |
